# Supplementary material
Source: HighWire-hosted journal article supplement (https://rmdopen.bmj.com/content/9/2/e002939)
Supplement: inline-supplementary-material-1 [file inline-supplementary-material-1.pdf]

Online supplemental material

Supplemental Figure 1. Study design

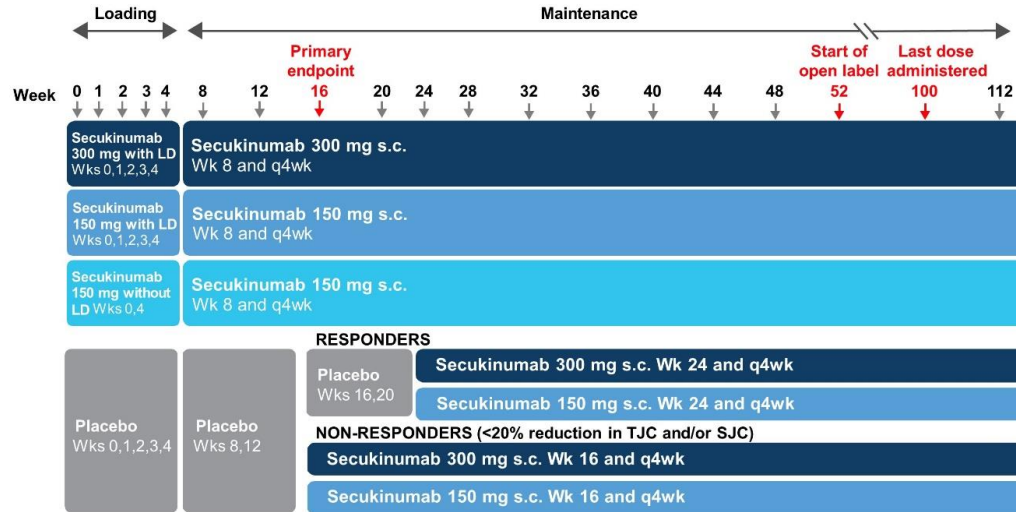

The dosage of secukinumab (150 mg or 300 mg) that placebo patients were re-randomised to receive at week 16 (non-responders) or week 24 (responders) was predetermined at baseline. Up-titration to secukinumab 150 mg to 300 mg at week 52 depended on investigator judgement LD, loading dose; SJC, swollen joint count; s.c, subcutaneous; TJC, tender joint count; wk, week

Supplemental Figure 2. Patient disposition

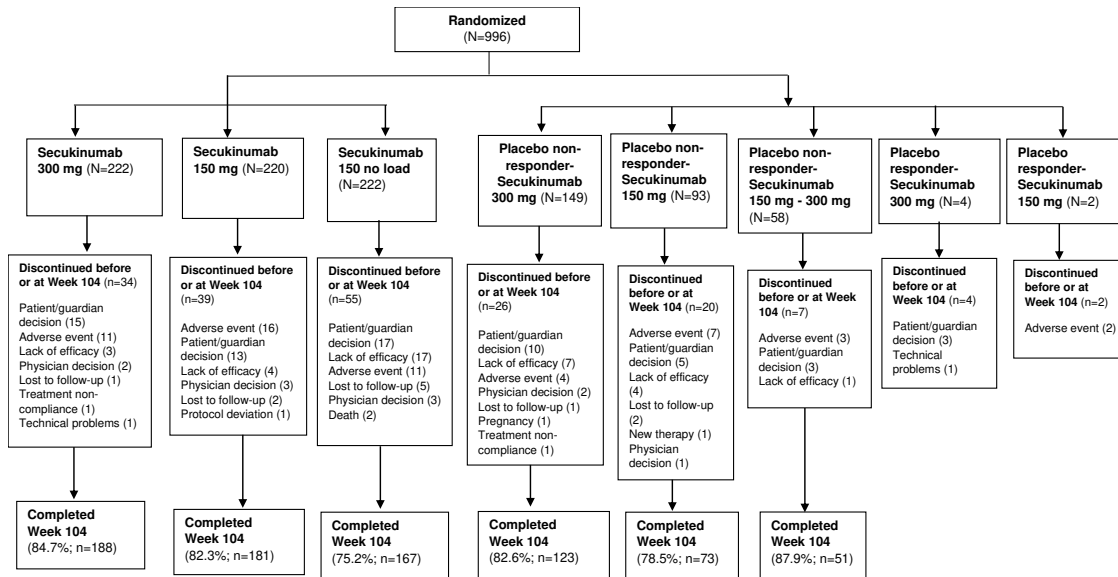

Twenty-six patients from placebo groups discontinued on or before week 16 and were not classified as responders or non-responders.

**Supplementary Table 1. Relationship between inhibition of structural damage (group level) and disease activity state**

| Change in vdH-mTSS, mean (SD) |                      | No response (Wk 24-52) |                       |                    | Only 1 response (Wk 24-52) |                      |                   | Sustained response for at least 3 visits |                       |                    |
|-------------------------------|----------------------|------------------------|-----------------------|--------------------|----------------------------|----------------------|-------------------|------------------------------------------|-----------------------|--------------------|
|                               |                      | SEC 150 mg LD (N=101)  | SEC 150 mg NL (N=91)  | SEC 300 mg (N=98)  | Sec 150 mg LD (N=14)       | Sec 150 mg NL (N=13) | Sec 300 mg (N=15) | Sec 150 mg LD (N=50)                     | Sec 150 mg NL (N=57)  | Sec 300 mg (N=65)  |
| <b>DAPSA REM</b>              | Baseline to Week 52  | 0.420 (2.27)           | 0.405 (1.63)          | 0.115 (1.91)       | 0.038 (0.80)               | -0.154 (0.63)        | 0.167 (0.72)      | -0.200 (1.32)                            | 0.219 (1.03)          | -0.108 (0.79)      |
|                               | Baseline to Week 104 | 0.857 (3.38)           | 0.522 (1.90)          | 0.744 (5.78)       | 0.167 (0.78)               | 0.077 (1.21)         | 0.033 (0.30)      | 0.010 (1.47)                             | 0.395 (2.95)          | -0.179 (1.14)      |
| <b>DAPSA LDA+ REM</b>         |                      | SEC 150 mg LD (N=29)   | SEC 150 mg NL (N=20)  | SEC 300 mg (N=26)  | SEC 150 mg LD (N=11)       | SEC 150 mg NL (N=10) | SEC 300 mg (N=17) | SEC 150 mg LD (N=122)                    | SEC 150 mg NL (N=131) | SEC 300 mg (N=143) |
|                               | Baseline to Week 52  | 0.963 (3.50)           | 0.025 (0.83)          | 0.487 (3.15)       | 0.045 (1.71)               | 0.278 (0.79)         | 0.147 (1.20)      | 0.050 (1.35)                             | 0.342 (1.49)          | -0.046 (0.97)      |
|                               | Baseline to Week 104 | 2.023 (5.61)           | 0.567 (1.45)          | 2.083 (10.56)      | 0.364 (1.78)               | 0.063 (0.62)         | 0.633 (3.37)      | 0.225 (1.53)                             | 0.434 (2.45)          | 0.024 (1.64)       |
| <b>MDA</b>                    |                      | SEC 150 mg LD (N=85)   | SEC 150 mg NL (N=74)  | SEC 300 mg (N=73)  | SEC 150 mg LD (N=20)       | SEC 150 mg NL (N=19) | SEC 300 mg (N=20) | SEC 150 mg LD (N=88)                     | SEC 150 mg NL (N=84)  | SEC 300 mg (N=106) |
|                               | Baseline to Week 52  | 0.423 (2.43)           | 0.301 (1.66)          | 0.176 (2.08)       | 0.05 (0.46)                | 0.219 (0.75)         | -0.275 (1.07)     | -0.076 (1.06)                            | 0.25 (1.10)           | -0.061 (0.95)      |
|                               | Baseline to Week 104 | 0.87 (3.54)            | 0.42 (1.80)           | 0.97 (6.56)        | 0.20 (0.77)                | 0.228 (1.51)         | -0.20 (1.04)      | 0.116 (1.19)                             | 0.39 (2.62)           | -0.03 (1.64)       |
| <b>VLDA</b>                   |                      | SEC 150 mg LD (N=137)  | SEC 150 mg NL (N=126) | SEC 300 mg (N=136) | SEC 150 mg LD (N=18)       | SEC 150 mg NL (N=16) | SEC 300 mg (N=18) | SEC 150 mg LD (N=34)                     | SEC 150 mg NL (N=35)  | SEC 300 mg (N=45)  |
|                               | Baseline to Week 52  | 0.294 (1.97)           | 0.302 (1.40)          | 0.109 (1.67)       | -0.147 (1.21)              | 0.344 (1.19)         | -0.028 (1.21)     | -0.103 (1.50)                            | 0.129 (1.11)          | -0.2 (0.73)        |
|                               | Baseline to Week 104 | 0.652 (2.94)           | 0.416 (1.66)          | 0.583 (4.95)       | -0.219 (1.17)              | 0.781 (5.41)         | -0.278 (1.52)     | 0.191 (1.67)                             | 0.2 (1.01)            | -0.278 (1.01)      |

Baseline was defined as the last observation on the day of or before the first dose of the study drug. At each time point, only patients with a value at both baseline and that time point were included. Sustained response was defined as achievement of the same response in at least 2 out of the next 6 visits (visits every 8 weeks). DAPSA, Disease Activity in Psoriatic Arthritis; LD, loading dose; LDA, low disease activity; MDA, minimal disease activity; N, number of patients with assessment at both weeks 24 and 104; NL, without loading dose; REM, remission; SD, standard deviation; SEC, secukinumab; vdH-mTSS, van der Heijde-modified total Sharp score; VLDA, very low disease activity

**Supplemental Table 2. List of Independent Ethics Committees (IEC) or Institutional Review Boards (IRB) by study centre**

| Centre No. | Ethics Committee or Institutional Review Board                                     | Department / Organization                                  | Address                                      |
|------------|------------------------------------------------------------------------------------|------------------------------------------------------------|----------------------------------------------|
| 1002       | Comité Independiente de Ética Para Ensayos En Farmacología Clínica                 | Fundación De Estudios Farmacología y de Medicamentos FEFyM | Buenos Aires, C1027AAP, Argentina            |
| 1004       | Comité Independiente de Ética Para Ensayos En Farmacología Clínica                 | Fundación De Estudios Farmacología y de Medicamentos FEFyM | Buenos Aires, 1027AAP, Argentina             |
| 1008       | Comite de Ética en Investigacion                                                   | Hospital General de Agudos J.M. Ramos Mejia                | Buenos Aires, 1221, Argentina                |
| 1021       | Ethikkommission der Medizinischen Universität Graz                                 |                                                            | Graz, A-8036, Austria                        |
| 1022       | Ethikkommission der Medizinischen Universität Graz                                 |                                                            | Graz, A-8036, Austria                        |
| 1023       | Ethikkommission der Medizinischen Universität Graz                                 |                                                            | Graz, A-8036, Austria                        |
| 1024       | Ethikkommission der Medizinischen Universität Graz                                 |                                                            | Graz, A-8036, Austria                        |
| 1061       | Health Research Ethics Authority                                                   |                                                            | St. John's, NL, A1B 2X5, Canada              |
| 1062       | IRB Services                                                                       |                                                            | Aurora, Ontario, L4G 0A5, Canada             |
| 1063       | IRB Services                                                                       |                                                            | Aurora, Ontario, L4G 0A5, Canada             |
| 1064       | University of British Columbia                                                     | Clinical Research Ethics Board                             | Vancouver, British Columbia, V5Z 1L8, Canada |
| 1065       | IRB Services                                                                       |                                                            | Aurora, Ontario, L4G 0A5, Canada             |
| 1066       | IRB Services                                                                       |                                                            | Aurora, Ontario, L4G 0A5, Canada             |
| 1081       | Comite de Evaluación Ético Científico, Servicio de Salud Metropolitano Sur Oriente |                                                            | Santiago, Región Metropolitana, Chile        |
| 1087       | Comite de Etica Cientifico Servicio de Salud Metropolitano Oriente                 |                                                            | Santiago, Region Metropolitana, Chile        |
| 2001       | Multicentric Ethics Committee IKEM and TN                                          |                                                            | Prague 4, 140 59, Czech Republic             |
| 2002       | Multicentric Ethics Committee IKEM and TN                                          |                                                            | Prague 4, 140 59, Czech Republic             |
| 2003       | Eticka komise Revmatologickeho ustavu                                              |                                                            | Praha 2, 128 50, Czech Republic              |
| 2004       | Multicentric Ethics Committee IKEM and TN                                          |                                                            | Prague 4, 140 59, Czech Republic             |
| 2005       | Multicentric Ethics Committee IKEM and TN                                          |                                                            | Prague 4, 140 59, Czech Republic             |
| 2007       | Multicentric Ethics Committee IKEM and TN                                          |                                                            | Prague 4, 140 59, Czech Republic             |
| 2008       | Multicentric Ethics Committee IKEM and TN                                          |                                                            | Prague 4, 140 59, Czech Republic             |
| 2021       | Region Syddanmark                                                                  | Regionshuset, Damhaven 12                                  | Vejlø, 7100, Denmark                         |
| 2043       | Tallinn Medical Research Ethics Committee                                          |                                                            | Tallinn, 11619, Estonia                      |
| 2053       | HUS Tutkimuseettiset toimikunnat                                                   | Eettinen toimikunta IV                                     | Helsinki, 00029 HUS, Finland                 |

| Centre No. | Ethics Committee or Institutional Review Board                                                                            | Department / Organization                              | Address                |
|------------|---------------------------------------------------------------------------------------------------------------------------|--------------------------------------------------------|------------------------|
| 2061       | Ethikkommission der Ärztekammer Westfalen- Lippe und der Medizinischen Fakultät der Landesamt für Gesundheit und Soziales | Geschäftsstelle der Ethik-Kommission des Landes Berlin | Berlin, 10707, Germany |
| 2062       | Ethikkommission der Ärztekammer Westfalen- Lippe und der Medizinischen Fakultät der Landesamt für Gesundheit und Soziales | Geschäftsstelle der Ethik-Kommission des Landes Berlin | Berlin, 10707, Germany |
| 2063       | Ethikkommission der Ärztekammer Westfalen- Lippe und der Medizinischen Fakultät der Landesamt für Gesundheit und Soziales | Geschäftsstelle der Ethik-Kommission des Landes Berlin | Berlin, 10707, Germany |
| 2064       | Ethikkommission der Ärztekammer Westfalen- Lippe und der Medizinischen Fakultät der Landesamt für Gesundheit und Soziales | Geschäftsstelle der Ethik-Kommission des Landes Berlin | Berlin, 10707, Germany |
| 2066       | Ethikkommission der Ärztekammer Westfalen- Lippe und der Medizinischen Fakultät der Landesamt für Gesundheit und Soziales | Geschäftsstelle der Ethik-Kommission des Landes Berlin | Berlin, 10707, Germany |
| 2068       | Ethikkommission der Ärztekammer Westfalen- Lippe und der Medizinischen Fakultät der Landesamt für Gesundheit und Soziales | Geschäftsstelle der Ethik-Kommission des Landes Berlin | Berlin, 10707, Germany |
| 2070       | Ethikkommission der Ärztekammer Westfalen- Lippe und der Medizinischen Fakultät der Landesamt für Gesundheit und Soziales | Geschäftsstelle der Ethik-Kommission des Landes Berlin | Berlin, 10707, Germany |
| 2071       | Ethikkommission der Ärztekammer Westfalen- Lippe und der Medizinischen Fakultät der Landesamt für Gesundheit und Soziales | Geschäftsstelle der Ethik-Kommission des Landes Berlin | Berlin, 10707, Germany |
| 2072       | Ethikkommission der Ärztekammer Westfalen- Lippe und der Medizinischen Fakultät der Landesamt für Gesundheit und Soziales | Geschäftsstelle der Ethik-Kommission des Landes Berlin | Berlin, 10707, Germany |
| 2075       | Ethikkommission der Ärztekammer Westfalen- Lippe und der Medizinischen Fakultät der Landesamt für Gesundheit und Soziales | Geschäftsstelle der Ethik-Kommission des Landes Berlin | Berlin, 10707, Germany |
| 2076       | Ethikkommission der Ärztekammer Westfalen- Lippe und der Medizinischen Fakultät der Landesamt für Gesundheit und Soziales | Geschäftsstelle der Ethik-Kommission des Landes Berlin | Berlin, 10707, Germany |
| 2078       | Ethikkommission der Ärztekammer Westfalen- Lippe und der Medizinischen Fakultät der Landesamt für Gesundheit und Soziales | Geschäftsstelle der Ethik-Kommission des Landes Berlin | Berlin, 10707, Germany |

| Centre No. | Ethics Committee or Institutional Review Board                                                                            | Department / Organization                              | Address                                                   |
|------------|---------------------------------------------------------------------------------------------------------------------------|--------------------------------------------------------|-----------------------------------------------------------|
|            | Soziales                                                                                                                  |                                                        |                                                           |
| 2079       | Ethikkommission der Ärztekammer Westfalen- Lippe und der Medizinischen Fakultät der Landesamt für Gesundheit und Soziales | Geschäftsstelle der Ethik-Kommission des Landes Berlin | Berlin, 10707, Germany                                    |
| 3003       | National Ethics Committee                                                                                                 |                                                        | Athens, Mesogion 284 Avenue, Cholargos, GR-15562, Greece  |
| 3004       | National Ethics Committee                                                                                                 |                                                        | Athens, Mesogion 284v Avenue, Cholargos, GR-15562, Greece |
| 3005       | National Ethics Committee                                                                                                 |                                                        | Athens, Mesogion 284 Avenue, Cholargos, GR-15562, Greece  |
| 3006       | National Ethics Committee                                                                                                 |                                                        | Athens, Mesogion 284 Avenue, Cholargos, GR-15562, Greece  |
| 3007       | National Ethics Committee                                                                                                 |                                                        | Athens, Mesogion 284 Avenue, Cholargos, GR-15562, Greece  |
| 3021       | Comité de Ética Independiente ZUGUEME                                                                                     |                                                        | Guatemala, 01015, Guatemala                               |
| 3022       | Comité de Ética Independiente ZUGUEME                                                                                     |                                                        | Guatemala, 01015, Guatemala                               |
| 3031       | Medical Research Council                                                                                                  | Ethics Committee for Clinical Pharmacology (ECCP)      | Budapest, 1054, Hungary                                   |
| 3032       | Medical Research Council                                                                                                  | Ethics Committee for Clinical Pharmacology (ECCP)      | Budapest, 1054, Hungary                                   |
| 3033       | Medical Research Council                                                                                                  | Ethics Committee for Clinical Pharmacology (ECCP)      | Budapest, 1054, Hungary                                   |
| 3034       | Medical Research Council                                                                                                  | Ethics Committee for Clinical Pharmacology (ECCP)      | Budapest, 1054, Hungary                                   |
| 3035       | Medical Research Council                                                                                                  | Ethics Committee for Clinical Pharmacology (ECCP)      | Budapest, 1054, Hungary                                   |
| 3036       | Medical Research Council                                                                                                  | Ethics Committee for Clinical Pharmacology (ECCP)      | Budapest, 1054, Hungary                                   |
| 3051       | KFRC Ethics Committee                                                                                                     | KIMS foundation and Research Center                    | Secunderabad, Telangana, 500003, India                    |
| 3052       | Pentamed Ethics Committee                                                                                                 | Ethics Committee                                       | Pune, Maharashtra, 411007, India                          |
| 3055       | Institutional Scientific and Ethics Board Kokilaben Dhirubhai Ambani Hospital & Medical Research Institute                | Ethics Committee                                       | Mumbai, Maharashtra, 400053, India                        |
| 3056       | Ethics Committee Shalby Limited                                                                                           |                                                        | Ahemdabad, Gujarat, 380058, India                         |
| 3057       | All India Institues Medical Sciences Institute Ethics Committee                                                           |                                                        | New Delhi, New Delhi, 110029, India                       |
| 3060       | Yash Society Ethics Committee                                                                                             |                                                        | Nasik, Maharashtra, 422201, India                         |
| 3071       | St Vincent's Healthcare                                                                                                   | Ethics and Medical Research Committee                  | Elm Park, Dublin 4, Ireland                               |
| 4001       | The Chaim Sheba Helsinki                                                                                                  |                                                        | Ramat Gan, Israel, 5266202, Israel                        |
| 4002       | Barzilai MC Helsinki                                                                                                      |                                                        | Ashkelon, 78278, Israel                                   |
| 4003       | Rabin MC Helsinki                                                                                                         |                                                        | Petah Tikva, 49100, Israel                                |
| 4004       | Sourasky MC Helsinki                                                                                                      |                                                        | Tel Aviv, 64239, Israel                                   |

| Centre No. | Ethics Committee or Institutional Review Board                                                                                                                     | Department / Organization        | Address                                 |
|------------|--------------------------------------------------------------------------------------------------------------------------------------------------------------------|----------------------------------|-----------------------------------------|
| 4005       | Meir Sapir MC Helsinki Committee                                                                                                                                   |                                  | Kfar Saba, Israel, 4428164, Israel      |
| 4006       | Carmel MC Helsinki                                                                                                                                                 |                                  | Haifa, 34362, Israel                    |
| 4011       | COMITATO ETICO DELLA PROVINCIA DI BRESCIA c/o AO Spedali Civili                                                                                                    |                                  | Brescia, Italy, 25123, Italy            |
| 4012       | Comitato Etico Unico Regionale (CEUR) c/o Direzione Scientifica del Centro di riferimento Oncologico di Aviano                                                     |                                  | UDINE, Italy, 33081, Italy              |
| 4014       | COMITATO ETICO UNICO REGIONALE PER LA BASILICATA C/O Segreteria Tecnico Scientifica del CEUR presso U.O.C. Medicina Legale Azienda Ospedaliera Regionale San Carlo |                                  | POTENZA, ITALY, 85100, Italy            |
| 4015       | COMITATO ETICO PALERMO 1 c/o AOU POLICLINICO P. GIACCONE DI PALERMO                                                                                                |                                  | PALERMO, 90127, Italy                   |
| 4016       | COMITATO ETICO DI PAVIA c/o FONDAZIONE IRCCS POLICLINICO SAN MATTEO DI PAVIA                                                                                       |                                  | PAVIA, ITALY, 27100, Italy              |
| 4031       | Ethics Committee for Clinical Research at Pauls Stradins Clinical University Hospital Development Society                                                          |                                  | Riga, LV-1002, Latvia                   |
| 4033       | Ethics Committee for Clinical Research at Pauls Stradins Clinical University Hospital Development Society                                                          |                                  | Riga, LV-1002, Latvia                   |
| 4034       | Ethics Committee for Clinical Research at Pauls Stradins Clinical University Hospital Development Society                                                          |                                  | Riga, LV-1002, Latvia                   |
| 4036       | Ethics Committee for Clinical Research at Pauls Stradins Clinical University Hospital Development Society                                                          |                                  | Riga, LV-1002, Latvia                   |
| 4052       | Lithuanian Bioethics Committee                                                                                                                                     | Central EC for Lithuania         | Vilnius, LT-03219, Lithuania            |
| 4053       | Lithuanian Bioethics Committee                                                                                                                                     | Central EC for Lithuania         | Vilnius, LT-03219, Lithuania            |
| 4054       | Lithuanian Bioethics Committee                                                                                                                                     | Central EC for Lithuania         | Vilnius, LT-03219, Lithuania            |
| 4055       | Lithuanian Bioethics Committee                                                                                                                                     | Central EC for Lithuania         | Vilnius, LT-03219, Lithuania            |
| 4056       | Lithuanian Bioethics Committee                                                                                                                                     | Central EC for Lithuania         | Vilnius, LT-03219, Lithuania            |
| 4058       | Lithuanian Bioethics Committee                                                                                                                                     | Central EC for Lithuania         | Vilnius, LT-03219, Lithuania            |
| 4071       | Mexico Centre for Clinical Research S.A. de C.V.                                                                                                                   | Comité de Ética en Investigación | Mexico, Distrito Federal, 03100, Mexico |
| 4072       | Mexico Centre for Clinical Research S.A. de C.V.                                                                                                                   | Comité de Ética en Investigación | Mexico, Distrito Federal, 03100, Mexico |

| Centre No. | Ethics Committee or Institutional Review Board               | Department / Organization                                  | Address                                 |
|------------|--------------------------------------------------------------|------------------------------------------------------------|-----------------------------------------|
| 4073       | Centro de Especialidades Medicas del Sureste S.A. de C.V.    |                                                            | Merida, Yucatan, 97000, Mexico          |
| 4075       | Mexico Centre for Clinical Research S.A. de C.V.             | Comité de Ética en Investigación                           | Mexico, Distrito Federal, 03100, Mexico |
| 4077       | Comité de Ética e Investigación de Clínica Bajío CLINBA, S.C |                                                            | Guanajuato, Guanajuato, 36090, Mexico   |
| 6001       | Maasstad Ziekenhuis                                          | Raad van Bestuur                                           | Rotterdam, 3079 DZ, Netherlands         |
| 6002       | ÙMC Utrecht                                                  | Raad van Bestuur                                           | Utrecht, 3584 CX, Netherlands           |
| 6003       | Maastricht UMC+                                              | Raad van Bestuur                                           | Maastricht, 6229 EV, Netherlands        |
| 6011       | Philippine General Hospital                                  | University of the Philippines Manila Research Ethics Board | Manila, 1000, Philippines               |
| 6012       | University of Santo Tomas                                    | Institutional Review Board                                 | Manila, 1008, Philippines               |
| 6013       | St. Luke's Medical Center                                    | Institutional Ethics Review Board                          | Quezon City, 1102, Philippines          |
| 6021       | LEC City clinical hospital #5                                | LEC                                                        | Nizhny Novgorod, 603005, Russia         |
| 6022       | LEC Kemerovo War Veterans Reg.Clinical Hospital              |                                                            | Kemerovo, 650099, Russia                |
| 6023       | LEC Ural State Medical Academy of Roszdrav                   | LEC                                                        | Ekaterinburg, 620028, Russia            |
| 6024       | LEC Soloviyev Clinical Hospital                              | LEC                                                        | Yaroslavl , 150003, Russia              |
| 6025       | LEC Chelyabinsk Region Clinical Hospital                     |                                                            | Chelyabinsk, 454076, Russia             |
| 6026       | LEC of State Pavlov Medical University                       |                                                            | Saint Petersburg, 197101, Russia        |
| 6027       | LEC Dermatovenearologic Dispensary # 10                      |                                                            | Saint Petersburg, 194021, Russia        |
| 6028       | LEC Interacademic IRB                                        |                                                            | Moscow, 119002, Russia                  |
| 6031       | LEC Kazan State Medical University                           |                                                            | Kazan, 420012, Russia                   |
| 6032       | LEC Chelyabinsk Region Clinical Hospital                     |                                                            | Chelyabinsk, 454076, Russia             |
| 6033       | LEC City hospital no.13                                      |                                                            | Nizhny Novgorod, 603018, Russia         |
| 6034       | LEC Rostov-on-Don State Med.University                       |                                                            | Rostov-on-Don, 344022, Russia           |
| 6035       | LEC Smolensk State Medical University                        |                                                            | Smolensk, 214019, Russia                |
| 6036       | LEC Orenburg State Medical University                        |                                                            | Orenburg, 460000, Russia                |
| 6037       | LEC Central City Hospital #7                                 | LEC                                                        | Ekaterinburg, 620137, Russia            |
| 6061       | Fundació Parc Taulí                                          | secretaria CEim                                            | Sabadel, Barcelona, Spain, 08208, Spain |
| 6063       | Fundació Parc Taulí                                          | secretaria CEim                                            | Sabadel, Barcelona, Spain, 08208, Spain |
| 6064       | Fundació Parc Taulí                                          | secretaria CEim                                            | Sabadel, Barcelona, Spain, 08208, Spain |
| 6065       | Fundació Parc Taulí                                          | secretaria CEim                                            | Sabadel, Barcelona, Spain, 08208, Spain |

| Centre No. | Ethics Committee or Institutional Review Board                                             | Department / Organization                                | Address                                |
|------------|--------------------------------------------------------------------------------------------|----------------------------------------------------------|----------------------------------------|
| 6066       | Fundació Parc Taulí                                                                        | secretaria CEim                                          | Sabadel, Barcelona, 08208, Spain       |
| 6067       | Fundació Parc Taulí                                                                        | secretaria CEim                                          | Sabadel, Barcelona, 08208, Spain       |
| 6068       | Fundació Parc Taulí                                                                        | secretaria CEim                                          | Sabadel, Barcelona, 08208, Spain       |
| 6069       | Fundació Parc Taulí                                                                        | secretaria CEim                                          | Sabadel, Barcelona, 08208, Spain       |
| 6071       | Fundació Parc Taulí                                                                        | secretaria CEim                                          | Sabadel, Barcelona, 08208, Spain       |
| 6072       | Fundació Parc Taulí                                                                        | secretaria CEim                                          | Sabadel, Barcelona, 08208, Spain       |
| 6073       | Fundació Parc Taulí                                                                        | secretaria CEim                                          | Sabadel, Barcelona, 08208, Spain       |
| 6074       | Fundació Parc Taulí                                                                        | secretaria CEim                                          | Sabadel, Barcelona, 08208, Spain       |
| 6075       | Fundació Parc Taulí                                                                        | secretaria CEim                                          | Sabadel, Barcelona, 08208, Spain       |
| 7004       | Regionala etikprövningsnämnden i Stockholm                                                 | FE289                                                    | Stockholm, 171 77, Sweden              |
| 7011       | The Institutional Review Board Royal Thai Army Medical Department                          |                                                          | Bangkok, 10400, Thailand               |
| 7012       | Ethical Clearance Committee on Human Rights related to Researches Involving Human Subjects |                                                          | Bangkok, 10400, Thailand               |
| 7013       | Human Research Protection Unit                                                             | Faculty of Medicine Siriraj Hospital, Mahidol University | Bangkok, 10700, Thailand               |
| 7014       | Office of Human Research Ethics Committee (HREC)                                           |                                                          | Songkla, 90110, Thailand               |
| 7015       | Research Ethics Committee                                                                  | Faculty of Medicine Chiang Mai University                | Chiang Mai, 50200, Thailand            |
| 7016       | The Khon Kaen University Ethics Committee for Human Research                               |                                                          | Khon Kaen, 40002, Thailand             |
| 7031       | NRES Committee North West - Liverpool Central                                              | Manchester HRA centre - 3rd Floor, Barlow House          | Manchester, UK, M1 3DZ, United Kingdom |
| 7032       | NRES Committee North West - Liverpool Central                                              | Manchester HRA centre - 3rd Floor, Barlow House          | Manchester, UK, M1 3DZ, United Kingdom |
| 7033       | NRES Committee North West - Liverpool Central                                              | Manchester HRA centre - 3rd Floor, Barlow House          | Manchester, UK, M1 3DZ, United Kingdom |
| 7034       | NRES Committee North West - Liverpool Central                                              | Manchester HRA centre - 3rd Floor, Barlow House          | Manchester, UK, M1 3DZ, United Kingdom |
| 7035       | NRES Committee North West - Liverpool Central                                              | Manchester HRA centre - 3rd Floor, Barlow House          | Manchester, UK, M1 3DZ, United Kingdom |
| 7036       | NRES Committee North West - Liverpool Central                                              | Manchester HRA centre - 3rd Floor, Barlow House          | Manchester, UK, M1 3DZ, United Kingdom |
| 7037       | NRES Committee North West - Liverpool Central                                              | Manchester HRA centre - 3rd Floor, Barlow House          | Manchester, UK, M1 3DZ, United Kingdom |
| 7038       | NRES Committee North West - Liverpool Central                                              | Manchester HRA centre - 3rd Floor, Barlow House          | Manchester, UK, M1 3DZ, United Kingdom |
| 7039       | NRES Committee North West - Liverpool Central                                              | Manchester HRA centre - 3rd Floor, Barlow House          | Manchester, UK, M1 3DZ, United Kingdom |
| 7040       | NRES Committee North West - Liverpool Central                                              | Manchester HRA centre - 3rd Floor, Barlow House          | Manchester, UK, M1 3DZ, United Kingdom |



| Centre No. | Ethics Committee or Institutional Review Board | Department / Organization                       | Address                                  |
|------------|------------------------------------------------|-------------------------------------------------|------------------------------------------|
| 7041       | NRES Committee North West - Liverpool Central  | Manchester HRA centre - 3rd Floor, Barlow House | Manchester, UK, M1 3DZ, United Kingdom   |
| 7042       | NRES Committee North West - Liverpool Central  | Manchester HRA centre - 3rd Floor, Barlow House | Manchester, UK, M1 3DZ, United Kingdom   |
| 7043       | NRES Committee North West - Liverpool Central  | Manchester HRA centre - 3rd Floor, Barlow House | Manchester, UK, M1 3DZ, United Kingdom   |
| 7044       | NRES Committee North West - Liverpool Central  | Manchester HRA centre - 3rd Floor, Barlow House | Manchester, UK, M1 3DZ, United Kingdom   |
| 7045       | NRES Committee North West - Liverpool Central  | Manchester HRA centre - 3rd Floor, Barlow House | Manchester, UK, M1 3DZ, United Kingdom   |
| 7046       | NRES Committee North West - Liverpool Central  | Manchester HRA centre - 3rd Floor, Barlow House | Manchester, UK, M1 3DZ, United Kingdom   |
| 7047       | NRES Committee North West - Liverpool Central  | Manchester HRA centre - 3rd Floor, Barlow House | Manchester, UK, M1 3DZ, United Kingdom   |
| 7048       | NRES Committee North West - Liverpool Central  | Manchester HRA centre - 3rd Floor, Barlow House | Manchester, UK, M1 3DZ, United Kingdom   |
| 7049       | NRES Committee North West - Liverpool Central  | Manchester HRA centre - 3rd Floor, Barlow House | Manchester, UK, M1 3DZ, United Kingdom   |
| 7050       | NRES Committee North West - Liverpool Central  | Manchester HRA centre - 3rd Floor, Barlow House | Manchester, UK, M1 3DZ, United Kingdom   |
| 7051       | NRES Committee North West - Liverpool Central  | Manchester HRA centre - 3rd Floor, Barlow House | Manchester, UK, M1 3DZ, United Kingdom   |
| 7052       | NRES Committee North West - Liverpool Central  | Manchester HRA centre - 3rd Floor, Barlow House | Manchester, UK, M1 3DZ, United Kingdom   |
| 5001       | ADVARRA, Inc.                                  |                                                 | Columbia, Maryland, 21046, United States |
| 5002       | ADVARRA, Inc.                                  |                                                 | Columbia, Maryland, 21046, United States |
| 5003       | Chesapeake IRB                                 |                                                 | Columbia, MD, 21046, United States       |
| 5004       | Chesapeake IRB                                 |                                                 | Columbia, MD, 21046, United States       |
| 5005       | ADVARRA, Inc.                                  |                                                 | Columbia, Maryland, 21046, United States |
| 5006       | Chesapeake                                     | Research Review                                 | Columbia, MD, 21046, United States       |
| 5007       | Chesapeake IRB                                 |                                                 | Columbia, MD, 21046, United States       |
| 5008       | Chesapeake IRB                                 |                                                 | Columbia, MD, 21046, United States       |
| 5009       | Chesapeake IRB                                 |                                                 | Columbia, MD, 21046, United States       |
| 5010       | Oregon Health & Science University             | Research Integrity Office                       | Portland, OR, 97239, United States       |
| 5012       | Chesapeake IRB                                 |                                                 | Columbia, MD, 21046, United States       |
| 5013       | Chesapeake                                     | Research Review                                 | Columbia, MD, 21046, United States       |
| 5014       | Chesapeake IRB                                 |                                                 | Columbia, MD, 21046, United States       |
| 5015       | Chesapeake IRB                                 |                                                 | Columbia, MD, 21046, United States       |
| 5016       | ADVARRA, Inc.                                  |                                                 | Columbia, Maryland, 21046, United States |
| 5018       | ADVARRA, Inc.                                  |                                                 | Columbia, Maryland, 21046, United States |
| 5019       | Chesapeake IRB                                 |                                                 | Columbia, MD, 21046,                     |

| Centre No. | Ethics Committee or Institutional Review Board                             | Department / Organization | Address                                  |
|------------|----------------------------------------------------------------------------|---------------------------|------------------------------------------|
|            |                                                                            |                           | United States                            |
| 5021       | WIRB                                                                       |                           | Olympia, WA, 98502-5010, United States   |
| 5023       | ADVARRA, Inc.                                                              |                           | Columbia, Maryland, 21046, United States |
| 5024       | ADVARRA, Inc.                                                              |                           | Columbia, Maryland, 21046, United States |
| 5025       | Quorum Review, Inc.                                                        |                           | Seattle, WA, 98101, United States        |
| 5026       | WIRB                                                                       |                           | Olympia, WA, 98502-5010, United States   |
| 8008       | Local Ethics Committee of National Hospital of Dermatology And Venereology |                           | Ha Noi, 100000, Vietnam                  |
| 8009       | Biomedical Research Ethics Committee - HCM Hospital of Dermato-Venereology |                           | Ho Chi Minh city, 700000, Vietnam        |
| 8010       | Biomedical Research Ethics Committee - HCM Hospital of Dermato-Venereology |                           | Ho Chi Minh city, 700000, Vietnam        |
